# Supplementary material for: Population structure and genetic diversity of 25 Russian sheep breeds based on whole-genome genotyping
Source: PubMed Central journal article supplement (PMC5968526; doi:10.1186/s12711-018-0399-5), 2018-05-24
Supplement: 12711_2018_399_MOESM1_ESM.pdf [file 12711_2018_399_MOESM1_ESM.pdf]

| Breed                           | Code | Population size<br>by year (thnd. heads) |       | Period of<br>creation                         | Breeding<br>region                                                | History of creation, breeds<br>involved in the development                                                                                                                                                             | Tail type | Production<br>type      |
|---------------------------------|------|------------------------------------------|-------|-----------------------------------------------|-------------------------------------------------------------------|------------------------------------------------------------------------------------------------------------------------------------------------------------------------------------------------------------------------|-----------|-------------------------|
|                                 |      | 2000                                     | 2015  |                                               |                                                                   |                                                                                                                                                                                                                        |           |                         |
| <b>COARSE WOOL SHEEP BREEDS</b> |      |                                          |       |                                               |                                                                   |                                                                                                                                                                                                                        |           |                         |
| Andean<br>Black                 | ANDB | 15.4                                     | 170.0 | 14 <sup>th</sup> –16 <sup>th</sup><br>century | Mountain area of the<br>Republic of Dagestan,<br>North Caucasus   | Breed was created by folk<br>selection                                                                                                                                                                                 | Long fat  | meat-wool-<br>milk type |
| Buubei                          | BUUB | -                                        | 18.4  | 2008                                          | Republic of Buryatia,<br>Yakutia (Republic of<br>Sakha)           | Long-term improvement of<br>indigenous Buryat sheep.                                                                                                                                                                   | Short fat | meat-wool<br>type       |
| Edilbai                         | EDLB | 14.5                                     | 163.0 | 19 <sup>th</sup> century                      | Volgograd Region<br>between the Ural River<br>and the Volga River | Breed was raised by crossing<br>Kazakh fat-rumped ewes<br>with Astrakhan rams                                                                                                                                          | Fat rump  | meat-fat<br>type        |
| Kalmyk                          | KALM | 29.7                                     | 27.3  | unknown                                       | Republic of Kalmykia                                              | Originated from native fat-<br>rumped sheep from China,<br>which were improved with<br>the Edilbai and Torgudsk<br>breed,                                                                                              | Fat rump  | meat-fat<br>type        |
| Karachaev                       | KRCH | 46.7                                     | 301.8 | 14 <sup>th</sup> –16 <sup>th</sup><br>century | Mountain area of the<br>Republic of Dagestan,<br>North Caucasus   | Breed was created by folk<br>selection                                                                                                                                                                                 | Long fat  | meat-wool-<br>milk type |
| Karakul                         | KARA | 28.1                                     | 41.4  | unknown                                       | Republic of Kalmykia,<br>Astrakhan Region                         | Two main theories of<br>creation:<br>1. Breed resulted from<br>crossing the black<br>indigenous sheep of Bukhara<br>with Afghan and native fat-<br>rumped sheep.<br>2. The ancestors of the<br>Karakul were brought by | Long fat  | sheepskin<br>type       |

|                                    |      |         |         |                                            |                                                           |                                                                                                              |            |                         |
|------------------------------------|------|---------|---------|--------------------------------------------|-----------------------------------------------------------|--------------------------------------------------------------------------------------------------------------|------------|-------------------------|
|                                    |      |         |         |                                            |                                                           | Arabs to Middle Asia in the 8th century, where it was created.                                               |            |                         |
| Kuchugur                           | KUCH | unknown | unknown | 19 <sup>th</sup> century                   | Voronezh and Kursk Areas                                  | Mating local crossbred coarse wool ewes with large Voloshian rams                                            | Long fat   | meat-wool type          |
| Lezgin                             | LEZG | 41.3    | 127.0   | 14 <sup>th</sup> -16 <sup>th</sup> century | Mountain area of the Republic of Dagestan, North Caucasus | Breed was created by folk selection                                                                          | Long fat   | meat-wool-milk type     |
| Romanov                            | RMNV | 16.0    | 70.4    | 17 <sup>th</sup> -18 <sup>th</sup> century | Yaroslavl, Ryazan and Moscow Regions                      | The breed originated in the Yaroslavl region by long-term selection of local sheep                           | Short thin | skin coat and meat type |
| Tushin                             | TUSH | 129.8   | 111.6   | 14 <sup>th</sup> -16 <sup>th</sup> century | Mountain area of the Republic of Dagestan, North Caucasus | Breed was created by folk selection                                                                          | Long fat   | meat-wool-milk type     |
| Tuva                               | TUVA | 61.3    | 241.1   | unknown                                    | Republic of Tyva                                          | The breed was raised under the harsh climate by indigenous nomadic tribes                                    | Short fat  | meat-wool type          |
| <b>SEMI-FINE WOOL SHEEP BREEDS</b> |      |         |         |                                            |                                                           |                                                                                                              |            |                         |
| Altai Mountain                     | ALTM | 159.7   | 84.9    | 1930-1940                                  | Altai Region                                              | The result of crossing local coarse wool fat-tailed sheep first with Grozny and then with Tsigai             | Long thin  | wool-meat type          |
| Kuibyshev                          | KUIB | 16.7    | 16.7    | 1936-1948                                  | Samara Region                                             | Mating local Cherkessk ewes with Romney rams; the F2 crosses were inbred without further use of Romney Marsh | Long thin  | meat-wool type          |

|                               |      |       |       |           |                                                                 |                                                                                                                                       |           |                |
|-------------------------------|------|-------|-------|-----------|-----------------------------------------------------------------|---------------------------------------------------------------------------------------------------------------------------------------|-----------|----------------|
| North Caucasian               | NCSN | 52.1  | 20.8  | 1944-1961 | Stavropol Region                                                | Stavropol ewes were improved with Romney Marsh and Lincoln rams.                                                                      | Long thin | meat-wool type |
| Russian Longhaired            | RULH | 47.0  | 12.3  | 1937-1978 | Voronezh Area                                                   | Complex reproductive crossing of local coarse wool sheep (Kuchugur, Mikhnov and Northern short-tailed breeds) with British Lincoln    | Long thin | meat-wool type |
| Tsigai                        | TZYG | 203.1 | 45.9  | 800 BCE   | Saratov and Rostov Regions                                      | Originated in the Balkans and was brought to Russia by Transylvanian farmers from Romania in 1914                                     | Long thin | wool-meat type |
| <b>FINE WOOL SHEEP BREEDS</b> |      |       |       |           |                                                                 |                                                                                                                                       |           |                |
| Baikal fine-fleeced           | BKFF | 476.9 | 215.9 | 1927-1956 | Yakutia (Republic of Sakha), Trans-Baikal area, Eastern Siberia | Improvement of local crossbred coarse wool Buryat-Mongolian sheep with Soviet Merino, Merino Précoce, Ascanian, Grozny and Altai rams | Long thin | wool-meat type |

|                   |      |       |       |                    |                                                                                                                                |                                                                                                               |           |                |
|-------------------|------|-------|-------|--------------------|--------------------------------------------------------------------------------------------------------------------------------|---------------------------------------------------------------------------------------------------------------|-----------|----------------|
| Dagestan Mountain | DAGM | 435.3 | 845.5 | 1933-1950          | Mountain and plain areas of the Republic of Dagestan, North Caucasus                                                           | Mating local coarse wool, fat-tailed ewes (Gunib breed) with rams of the Wurttemberg breed (Merinolandschaf). | Long thin | meat-wool type |
| Groznensk         | GRZN | 469.6 | 728.7 | 1923-1951          | Republic of Kalmykia, Stavropol and Astrakhan Regions, the plains of the Republic of Dagestan, South of Russia, North Caucasus | Local fine wool New Caucasian and Mazaev ewes were improved with Australian Merino                            | Long thin | wool type      |
| Kulundin          | KLND | -     | 1.7   | 2008<br>(new type) | Altai Region                                                                                                                   | Introductory crossing of Altai ewes with Grozny, Australian Merino and Manych Merino rams                     | Long thin | wool-meat type |
| Manych Merino     | MANM | 45.6  | 26.4  | 1972-1983          | Stavropol Region                                                                                                               | Crossing of the Stavropol breed with Australian Merino                                                        | Long thin | wool type      |
| Salsk             | SALS | 6.9   | 6.6   | 1922-1950          | Rostov Region                                                                                                                  | Local New Caucasian and Mazaev ewes were improved with American Rambouillet                                   | Long thin | wool type      |
| Soviet Merino     | SOVM | 496.2 | 259.0 | 1920-1950          | Stavropol Region                                                                                                               | Local New Caucasian and Mazaev ewes were improved with Australian Merino and Rambouillet                      | Long thin | wool type      |
| Stavropol         | STAV | 577.4 | 111.5 | 1923-1950          | Stavropol Region                                                                                                               | Local New Caucasian and Mazaev ewes were improved with Australian Merino and American Rambouillet             | Long thin | wool type      |
| Volgograd         | VOLG | 134.8 | 116.8 | 1946-1978          | Volgograd Region                                                                                                               | Mating local crossbred coarse wool, fat-tailed ewes                                                           | Long thin | meat-wool type |

|  |  |  |  |  |  |                                                                                          |  |  |
|--|--|--|--|--|--|------------------------------------------------------------------------------------------|--|--|
|  |  |  |  |  |  | with rams of different breeds<br>(Merino Précoce, Caucasian,<br>Grozny and New Caucasia) |  |  |
|--|--|--|--|--|--|------------------------------------------------------------------------------------------|--|--|
