# Supplementary material for: Population structure and genetic diversity of 25 Russian sheep breeds based on whole-genome genotyping
Source: PubMed Central journal article supplement (PMC5968526; doi:10.1186/s12711-018-0399-5), 2018-05-24
Supplement: 12711_2018_399_MOESM2_ESM.pdf [file 12711_2018_399_MOESM2_ESM.pdf]

|    | Breed                              | Color / Code                                                                        | n  | Country (region) of sample collection (comments) | Source              |
|----|------------------------------------|-------------------------------------------------------------------------------------|----|--------------------------------------------------|---------------------|
|    | <b>Russia</b>                      |                                                                                     |    |                                                  |                     |
|    | <b>Coarse wool breeds (CW)</b>     |    |    |                                                  |                     |
| 1  | Andean Black                       | ANDB                                                                                | 10 | Republic of Dagestan                             | own                 |
| 2  | Buubei                             | BUUB                                                                                | 13 | Yakutia (Republic of Sakha)                      | own                 |
| 3  | Edilbai                            | EDLB                                                                                | 14 | Volgograd region                                 | own                 |
| 4  | Kalmyk                             | KALM                                                                                | 16 | Republic of Kalmykia                             | own                 |
| 5  | Karakul                            | KARA                                                                                | 20 | Astrakhan region                                 | own                 |
| 6  | Karachaeu                          | KRCH                                                                                | 16 | Karachaeu-Cherkessk Republic                     | own                 |
| 7  | Kuchugur                           | KUCH                                                                                | 11 | Voronezh region                                  | own                 |
| 8  | Lezgin                             | LEZG                                                                                | 14 | Republic of Dagestan                             | own                 |
| 9  | Romanov                            | RMNV                                                                                | 26 | Yaroslavl region                                 | own                 |
| 10 | Tushin                             | TUSH                                                                                | 9  | Republic of Dagestan                             | own                 |
| 11 | Tuva                               | TUVA                                                                                | 16 | Republic of Tyva                                 | own                 |
|    | <b>Semi-fine wool breeds (SFW)</b> |    |    |                                                  |                     |
| 12 | Altai Mountain                     | ALTM                                                                                | 12 | Russia, Altai region                             | own                 |
| 13 | Kuibyshev                          | KUIB                                                                                | 15 | Russia, Samara region                            | own                 |
| 14 | North-Caucasian                    | NCSN                                                                                | 16 | Russia, Stavropol region                         | own                 |
| 15 | Russian Longhaired                 | RULH                                                                                | 14 | Russia, Voronezh region                          | own                 |
| 16 | Tsigai                             | TZYG                                                                                | 16 | Russia, Saratov region                           | own                 |
|    | <b>Fine wool breeds (FW)</b>       |  |    |                                                  |                     |
| 17 | Dagestan Mountain                  | DAGM                                                                                | 16 | Russia, Republic of Dagestan                     | own                 |
| 18 | Groznensk                          | GRZN                                                                                | 13 | Russia, Stavropol region                         | own                 |
| 19 | Kulundin                           | KLND                                                                                | 16 | Russia, Altai region                             | own                 |
| 20 | Manych Merino                      | MANM                                                                                | 16 | Russia, Stavropol region                         | own                 |
| 21 | Salsk                              | SALS                                                                                | 16 | Russia, Rostov region                            | own                 |
| 22 | Soviet Merino                      | SOVM                                                                                | 14 | Russia, Stavropol region                         | own                 |
| 23 | Stavropol                          | STAV                                                                                | 14 | Russia, Stavropol region                         | own                 |
| 24 | Volgograd                          | VOLG                                                                                | 15 | Russia, Volgograd region                         | own                 |
|    | <b>British Isles</b>               |  |    |                                                  |                     |
| 25 | Australian Poll Dorset             | APD                                                                                 | 16 | Australia                                        | Kijas et al., 2012  |
| 26 | Australian Suffolk                 | ASU                                                                                 | 42 | Australia (derived from English Suffolk)         | Kijas et al., 2012  |
| 27 | Badger Faced                       | BAF                                                                                 | 16 | Wales                                            | Beynon et al., 2015 |
| 28 | Brecknock Hill Cheviot             | BHC                                                                                 | 16 | Wales                                            | Beynon et al., 2015 |
| 29 | Australian Coopworth               | CPW                                                                                 | 14 | Australia (derived from NZ Coopworth)            | Kijas et al., 2012  |
| 30 | Galway                             | GAL                                                                                 | 11 | Ireland                                          | Kijas et al., 2012  |
| 31 | Hill Flock Welsh Mountain          | HFWM                                                                                | 12 | Wales                                            | Beynon et al., 2015 |
| 32 | Hill Radnor                        | HRA                                                                                 | 12 | Wales                                            | Beynon et al., 2015 |
| 33 | Improved Welsh Mountain            | IWM                                                                                 | 10 | Wales                                            | Beynon et al., 2015 |
| 34 | Llandovery White Faced             | LWF                                                                                 | 18 | Wales                                            | Beynon et al., 2015 |
| 35 | New Zealand Romney                 | ROM                                                                                 | 17 | New Zealand (derived from Engl. Romney)          | Kijas et al., 2012  |

|    |                               |                                                                                     |    |                                         |                     |
|----|-------------------------------|-------------------------------------------------------------------------------------|----|-----------------------------------------|---------------------|
| 36 | Scottish Blackface            | SBF                                                                                 | 18 | Scotland                                | Kijas et al., 2012  |
| 37 | Welsh Hardy Speckled Faced    | WHSF                                                                                | 16 | Wales                                   | Beynon et al., 2015 |
|    | <b>Northern Europe</b>        |    |    |                                         |                     |
| 38 | East Friesian Brown           | EFB                                                                                 | 10 | Germany (originated from the Friesland) | Kijas et al., 2012  |
| 39 | Finnsheep                     | FIN                                                                                 | 44 | Finland                                 | Kijas et al., 2012  |
| 40 | German Texel                  | GTX                                                                                 | 22 | Germany (derived from Dutch Texel)      | Kijas et al., 2012  |
| 41 | Norway Spaelsau               | NSP                                                                                 | 38 | Norway                                  | Kijas et al., 2012  |
| 42 | New Zealand Texel             | NTX                                                                                 | 14 | New Zealand (derived from Dutch Texel)  | Kijas et al., 2012  |
|    | <b>Central Europe - Swiss</b> |    |    |                                         |                     |
| 43 | Bündner Oberländer Sheep      | BOS                                                                                 | 12 | Switzerland                             | Kijas et al., 2012  |
| 44 | Engadine Red Sheep            | ERS                                                                                 | 18 | Switzerland                             | Kijas et al., 2012  |
| 45 | Swiss Black-Brown Mountain    | SBS                                                                                 | 17 | Switzerland                             | Kijas et al., 2012  |
| 46 | Swiss Mirror Sheep            | SMS                                                                                 | 13 | Switzerland                             | Kijas et al., 2012  |
| 47 | Swiss White Alpine            | SWA                                                                                 | 18 | Switzerland                             | Kijas et al., 2012  |
| 48 | Valais Blacknose Sheep        | VBS                                                                                 | 12 | Switzerland                             | Kijas et al., 2012  |
|    | <b>South-West Europe</b>      |    |    |                                         |                     |
| 49 | Arawapa                       | APA                                                                                 | 10 | New Zealand                             | Ciani et al., 2015  |
| 50 | Australian Poll Merino        | APM                                                                                 | 46 | Australia (derived from Spanish Merino) | Kijas et al., 2012  |
| 51 | Appenninica                   | APP                                                                                 | 22 | Italy                                   | Ciani et al., 2014  |
| 52 | Castellana                    | CAS                                                                                 | 17 | Spain                                   | Kijas et al., 2012  |
| 53 | Chios                         | CHI                                                                                 | 16 | Greece                                  | Kijas et al., 2012  |
| 54 | Churra                        | CHU                                                                                 | 50 | Spain                                   | Kijas et al., 2012  |
| 55 | Chinese Merino                | CME                                                                                 | 22 | China (derived from Spanish Merino)     | Kijas et al., 2012  |
| 56 | Comisana                      | COM                                                                                 | 24 | Italy                                   | Ciani et al., 2014  |
| 57 | Gentile di Puglia             | GEN                                                                                 | 18 | Italy                                   | Ciani et al., 2014  |
| 58 | Lacaune                       | LAC                                                                                 | 43 | France                                  | Kijas,2012          |
| 59 | Laticauda                     | LAT                                                                                 | 21 | Italy                                   | Ciani et al., 2014  |
| 60 | Leccese                       | LEC                                                                                 | 17 | Italy                                   | Ciani et al., 2014  |
| 61 | Massese                       | MAS                                                                                 | 14 | Italy                                   | Ciani et al., 2014  |
| 62 | Merino                        | MER                                                                                 | 48 | Spain                                   | Kijas et al., 2012  |
| 63 | Merinolandschaf               | MLA                                                                                 | 20 | Germany (derived from Spanish Merino)   | Kijas et al., 2012  |
| 64 | Merinizzata Italiana          | MNZ                                                                                 | 17 | Italy                                   | Ciani et al., 2015  |
| 65 | Ojalada                       | OJA                                                                                 | 24 | Spain                                   | Kijas et al., 2012  |
| 66 | Rasa Aragonesa                | RAA                                                                                 | 19 | Spain                                   | Kijas et al., 2012  |
| 67 | Rambouillet                   | RMB                                                                                 | 40 | France                                  | Kijas et al., 2012  |
| 68 | Sardinian White               | SAW                                                                                 | 19 | Italy                                   | Kijas et al., 2012  |
| 69 | Spanish Merinos Estrema Dura  | SMED                                                                                | 13 | Spain                                   | Ciani et al., 2015  |
| 70 | Sopravissana                  | SOP                                                                                 | 22 | Italy                                   | Ciani et al., 2014  |
|    | <b>Asia</b>                   |  |    |                                         |                     |
| 71 | Changthangi                   | CHA                                                                                 | 16 | China (Tibet)                           | Kijas et al., 2012  |
| 72 | Deccani                       | IDC                                                                                 | 16 | India                                   | Kijas,2012          |
| 73 | Tibetan                       | TIB                                                                                 | 14 | China (Tibet)                           | Kijas et al., 2012  |

|    |                        |                                                                                   |    |              |                    |
|----|------------------------|-----------------------------------------------------------------------------------|----|--------------|--------------------|
|    | <b>South-West Asia</b> |  |    |              |                    |
| 74 | Afshari                | AFS                                                                               | 19 | Iran         | Kijas et al., 2012 |
| 75 | Moghani                | MOG                                                                               | 29 | Iran         | Kijas et al., 2012 |
| 76 | Qezel                  | QEZ                                                                               | 32 | Iran         | Kijas et al., 2012 |
|    | <b>South Africa</b>    |  |    |              |                    |
| 77 | African Dorper         | ADP                                                                               | 10 | South Africa | Kijas et al., 2012 |
| 78 | Ethiopian Menz         | EMZ                                                                               | 21 | Ethiopia     | Kijas et al., 2012 |
|    | <b>Americas</b>        |  |    |              |                    |
| 79 | Barbados Black Belly   | BBB                                                                               | 14 | Barbados     | Kijas et al., 2012 |
| 80 | Brazilian Creole       | BCS                                                                               | 15 | Brazil       | Kijas et al., 2012 |
| 81 | Santa Ines             | BSI                                                                               | 28 | Brazil       | Kijas et al., 2012 |
| 82 | Gulf Coast Native      | GCN                                                                               | 40 | USA          | Kijas et al., 2012 |
