# Supplementary material for: Population structure and genetic diversity of 25 Russian sheep breeds based on whole-genome genotyping
Source: PubMed Central journal article supplement (PMC5968526; doi:10.1186/s12711-018-0399-5), 2018-05-24
Supplement: 12711_2018_399_MOESM3_ESM.pdf [file 12711_2018_399_MOESM3_ESM.pdf]

| Breed codes | Fixation index (Fst) |       |       |       |       |       |       |       |       |       |       |       |       |       |       |       |       |       |       |       |       |       |       |       |      |
|-------------|----------------------|-------|-------|-------|-------|-------|-------|-------|-------|-------|-------|-------|-------|-------|-------|-------|-------|-------|-------|-------|-------|-------|-------|-------|------|
|             | ANDB                 | BUUB  | EDLB  | KALM  | KRCH  | KARA  | KUCH  | LEZG  | RMNV  | TUSH  | TUVA  | ALTM  | KUIB  | NCSN  | RULH  | TZYG  | BKFF  | DAGM  | GRZN  | KLND  | MANM  | SALS  | SOVM  | STAV  | VOLG |
| ANDB        |                      |       |       |       |       |       |       |       |       |       |       |       |       |       |       |       |       |       |       |       |       |       |       |       |      |
| BUUB        | 0,064                |       |       |       |       |       |       |       |       |       |       |       |       |       |       |       |       |       |       |       |       |       |       |       |      |
| EDLB        | 0,047                | 0,038 |       |       |       |       |       |       |       |       |       |       |       |       |       |       |       |       |       |       |       |       |       |       |      |
| KALM        | 0,046                | 0,038 | 0,007 |       |       |       |       |       |       |       |       |       |       |       |       |       |       |       |       |       |       |       |       |       |      |
| KRCH        | 0,036                | 0,042 | 0,027 | 0,027 |       |       |       |       |       |       |       |       |       |       |       |       |       |       |       |       |       |       |       |       |      |
| KARA        | 0,049                | 0,043 | 0,023 | 0,024 | 0,031 |       |       |       |       |       |       |       |       |       |       |       |       |       |       |       |       |       |       |       |      |
| KUCH        | 0,103                | 0,095 | 0,085 | 0,082 | 0,079 | 0,089 |       |       |       |       |       |       |       |       |       |       |       |       |       |       |       |       |       |       |      |
| LEZG        | 0,040                | 0,043 | 0,026 | 0,025 | 0,023 | 0,028 | 0,082 |       |       |       |       |       |       |       |       |       |       |       |       |       |       |       |       |       |      |
| RMNV        | 0,113                | 0,104 | 0,096 | 0,093 | 0,088 | 0,101 | 0,124 | 0,095 |       |       |       |       |       |       |       |       |       |       |       |       |       |       |       |       |      |
| TUSH        | 0,038                | 0,043 | 0,026 | 0,025 | 0,021 | 0,027 | 0,083 | 0,018 | 0,095 |       |       |       |       |       |       |       |       |       |       |       |       |       |       |       |      |
| TUVA        | 0,045                | 0,033 | 0,018 | 0,018 | 0,025 | 0,024 | 0,083 | 0,026 | 0,092 | 0,025 |       |       |       |       |       |       |       |       |       |       |       |       |       |       |      |
| ALTM        | 0,064                | 0,055 | 0,046 | 0,043 | 0,033 | 0,049 | 0,073 | 0,040 | 0,085 | 0,038 | 0,044 |       |       |       |       |       |       |       |       |       |       |       |       |       |      |
| KUIB        | 0,077                | 0,066 | 0,059 | 0,055 | 0,048 | 0,062 | 0,077 | 0,052 | 0,084 | 0,052 | 0,056 | 0,030 |       |       |       |       |       |       |       |       |       |       |       |       |      |
| NCSN        | 0,096                | 0,084 | 0,078 | 0,073 | 0,064 | 0,081 | 0,091 | 0,070 | 0,100 | 0,069 | 0,076 | 0,041 | 0,020 |       |       |       |       |       |       |       |       |       |       |       |      |
| RULH        | 0,105                | 0,096 | 0,088 | 0,085 | 0,075 | 0,092 | 0,100 | 0,083 | 0,112 | 0,081 | 0,086 | 0,059 | 0,046 | 0,048 |       |       |       |       |       |       |       |       |       |       |      |
| TZYG        | 0,062                | 0,054 | 0,044 | 0,041 | 0,035 | 0,046 | 0,068 | 0,037 | 0,085 | 0,036 | 0,042 | 0,013 | 0,030 | 0,044 | 0,059 |       |       |       |       |       |       |       |       |       |      |
| BKFF        | 0,068                | 0,053 | 0,047 | 0,042 | 0,036 | 0,050 | 0,075 | 0,039 | 0,085 | 0,039 | 0,043 | 0,018 | 0,020 | 0,027 | 0,057 | 0,020 |       |       |       |       |       |       |       |       |      |
| DAGM        | 0,070                | 0,063 | 0,055 | 0,051 | 0,044 | 0,057 | 0,082 | 0,044 | 0,091 | 0,043 | 0,053 | 0,031 | 0,038 | 0,047 | 0,070 | 0,031 | 0,022 |       |       |       |       |       |       |       |      |
| GRZN        | 0,075                | 0,063 | 0,058 | 0,052 | 0,045 | 0,060 | 0,079 | 0,047 | 0,088 | 0,046 | 0,055 | 0,022 | 0,026 | 0,031 | 0,062 | 0,023 | 0,006 | 0,024 |       |       |       |       |       |       |      |
| KLND        | 0,098                | 0,085 | 0,080 | 0,074 | 0,068 | 0,082 | 0,100 | 0,071 | 0,110 | 0,071 | 0,077 | 0,043 | 0,048 | 0,052 | 0,084 | 0,045 | 0,027 | 0,045 | 0,024 |       |       |       |       |       |      |
| MANM        | 0,082                | 0,071 | 0,065 | 0,059 | 0,053 | 0,068 | 0,086 | 0,055 | 0,095 | 0,055 | 0,062 | 0,029 | 0,034 | 0,039 | 0,070 | 0,030 | 0,015 | 0,032 | 0,010 | 0,028 |       |       |       |       |      |
| SALS        | 0,086                | 0,072 | 0,067 | 0,062 | 0,055 | 0,070 | 0,087 | 0,057 | 0,097 | 0,057 | 0,065 | 0,030 | 0,034 | 0,038 | 0,072 | 0,032 | 0,014 | 0,033 | 0,011 | 0,029 | 0,018 |       |       |       |      |
| SOVM        | 0,080                | 0,065 | 0,061 | 0,055 | 0,049 | 0,064 | 0,081 | 0,051 | 0,092 | 0,050 | 0,058 | 0,024 | 0,029 | 0,034 | 0,066 | 0,025 | 0,007 | 0,027 | 0,004 | 0,023 | 0,011 | 0,008 |       |       |      |
| STAV        | 0,085                | 0,072 | 0,067 | 0,062 | 0,054 | 0,070 | 0,087 | 0,057 | 0,097 | 0,057 | 0,064 | 0,030 | 0,034 | 0,038 | 0,071 | 0,032 | 0,014 | 0,032 | 0,008 | 0,028 | 0,012 | 0,014 | 0,008 |       |      |
| VOLG        | 0,086                | 0,073 | 0,067 | 0,062 | 0,055 | 0,071 | 0,090 | 0,058 | 0,100 | 0,058 | 0,065 | 0,034 | 0,039 | 0,044 | 0,074 | 0,035 | 0,018 | 0,036 | 0,018 | 0,036 | 0,027 | 0,023 | 0,016 | 0,024 |      |
