# Supplementary material for: Population structure and genetic diversity of 25 Russian sheep breeds based on whole-genome genotyping
Source: PubMed Central journal article supplement (PMC5968526; doi:10.1186/s12711-018-0399-5), 2018-05-24

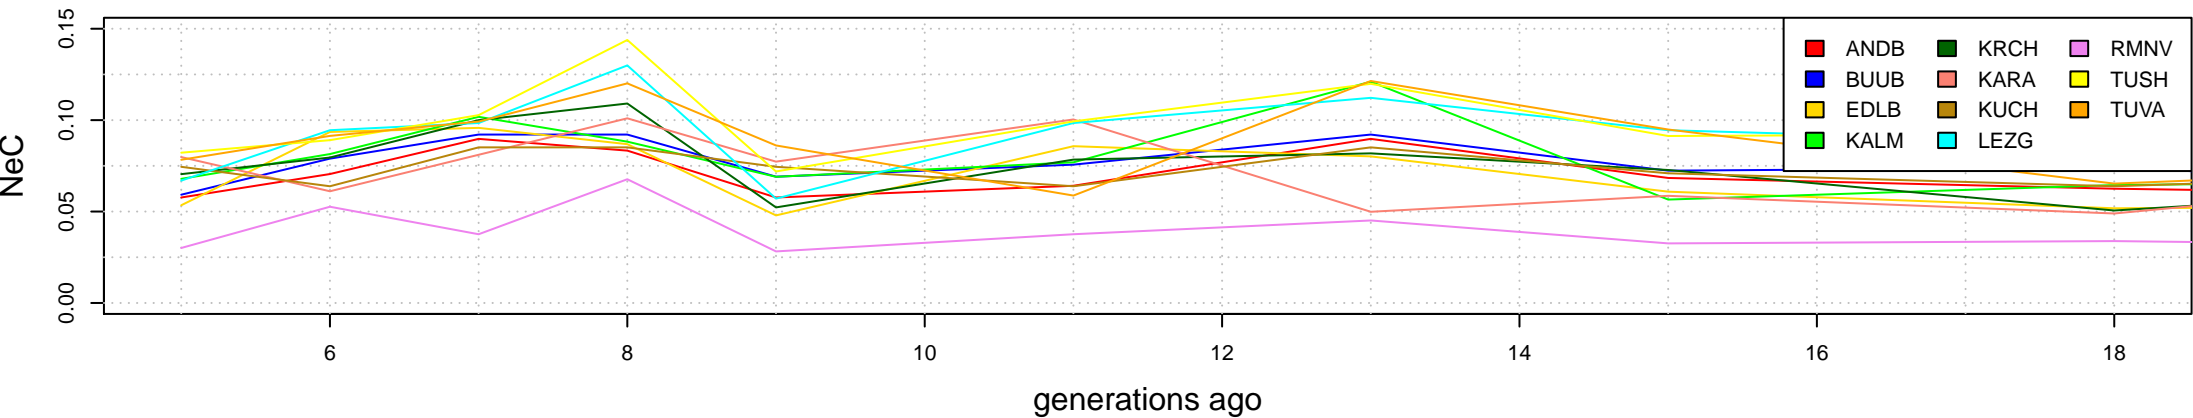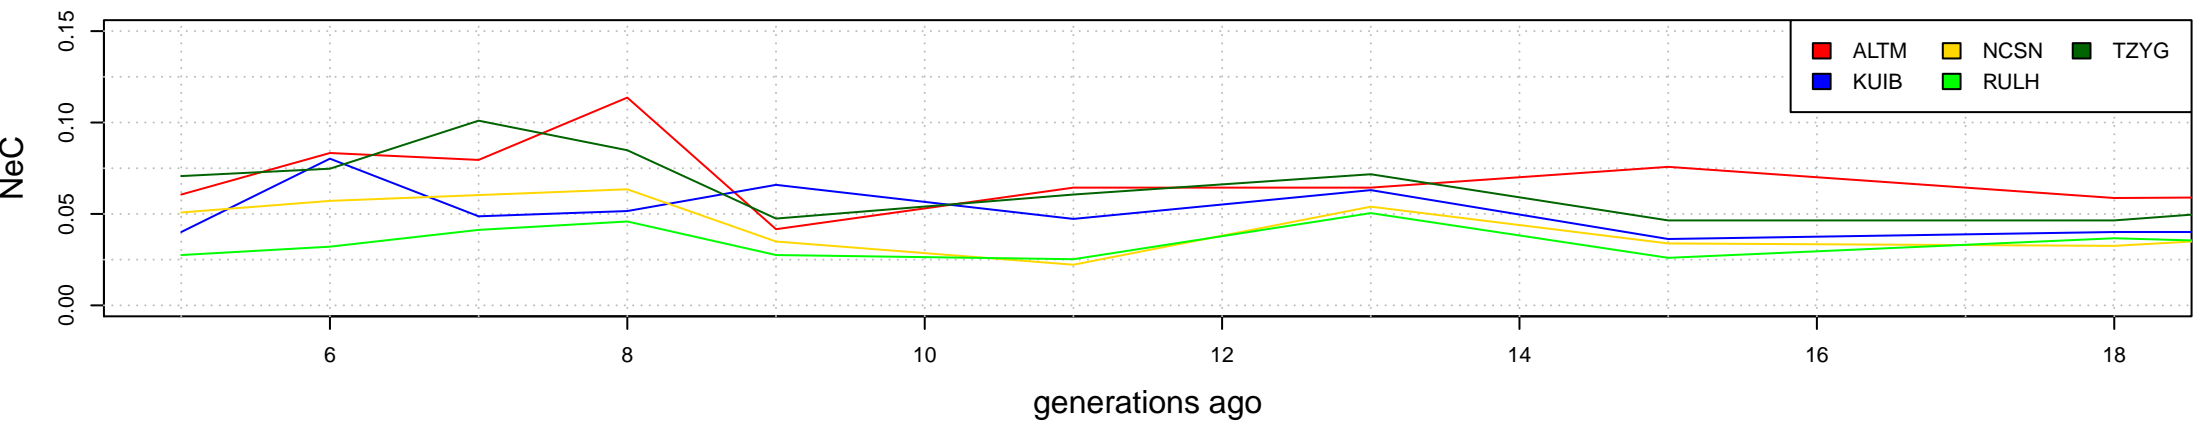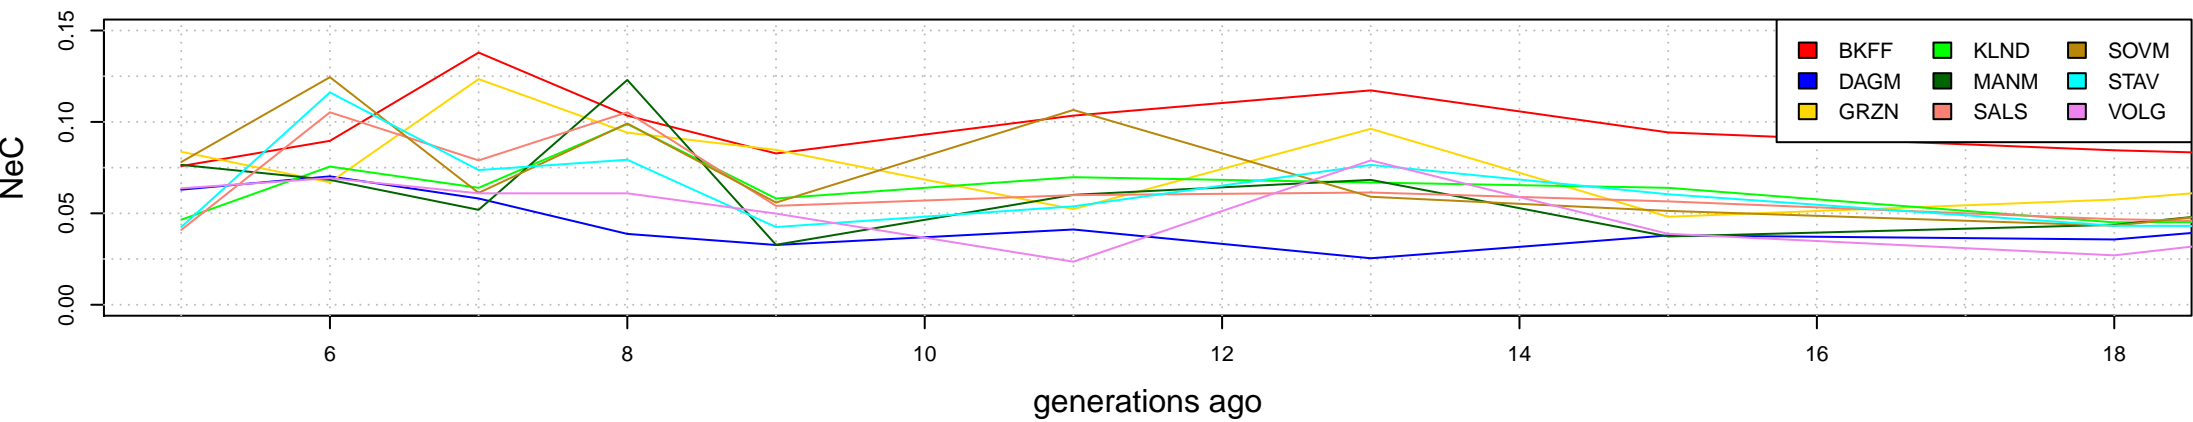

Supplement: 12711_2018_399_MOESM4_ESM.pdf [file 12711_2018_399_MOESM4_ESM.pdf]
